# Supplementary material for: Identification of differentially expressed tumour-related genes regulated by UHRF1-driven DNA methylation
Source: PubMed Central journal article supplement — Sci Rep. 2024 Aug 7;14:18371. doi: 10.1038/s41598-024-69110-2 (PMC11306747; doi:10.1038/s41598-024-69110-2), 2024-08-07
Supplement: 41598_2024_69110_MOESM1_ESM.pdf [file 41598_2024_69110_MOESM1_ESM.pdf]

Supplementary Fig.1

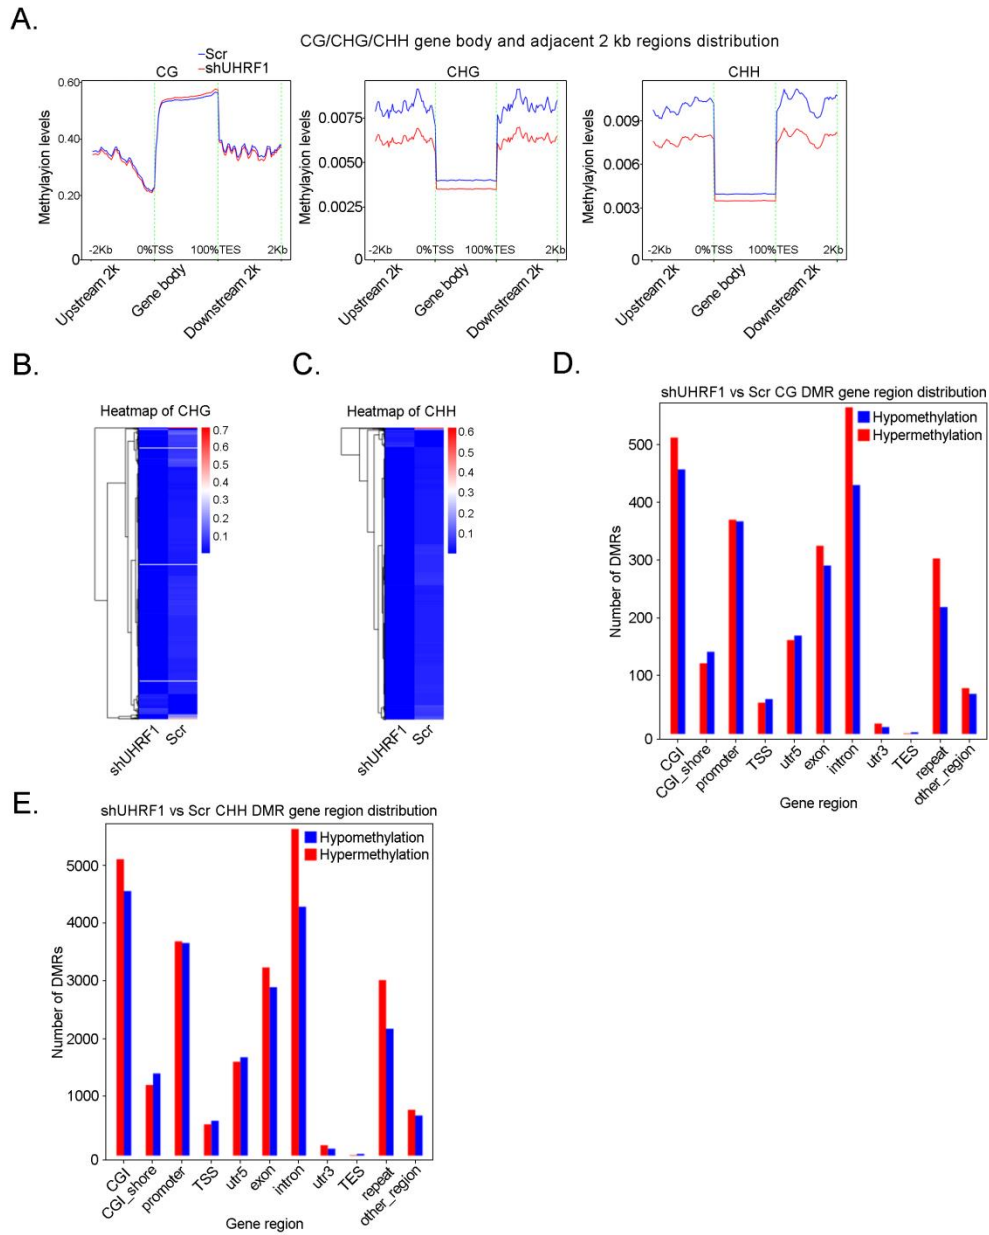

**Supplementary Fig. 1 CHG context and CHH context methylation characteristic analysis of UHRF1-shRNA and scramble MCF-7 cells.** A methylation level of CG context, CHG context and CHH context in the gene body and adjacent 2 kb regions distribution are shown. TSS, transcription initiation site; TES, transcription termination site. B and C Cluster heatmap of the CHG (B) and CHH (C). D and E The CG (D) and CHH (E) context DMR gene region distribution.

Supplementary Fig.2

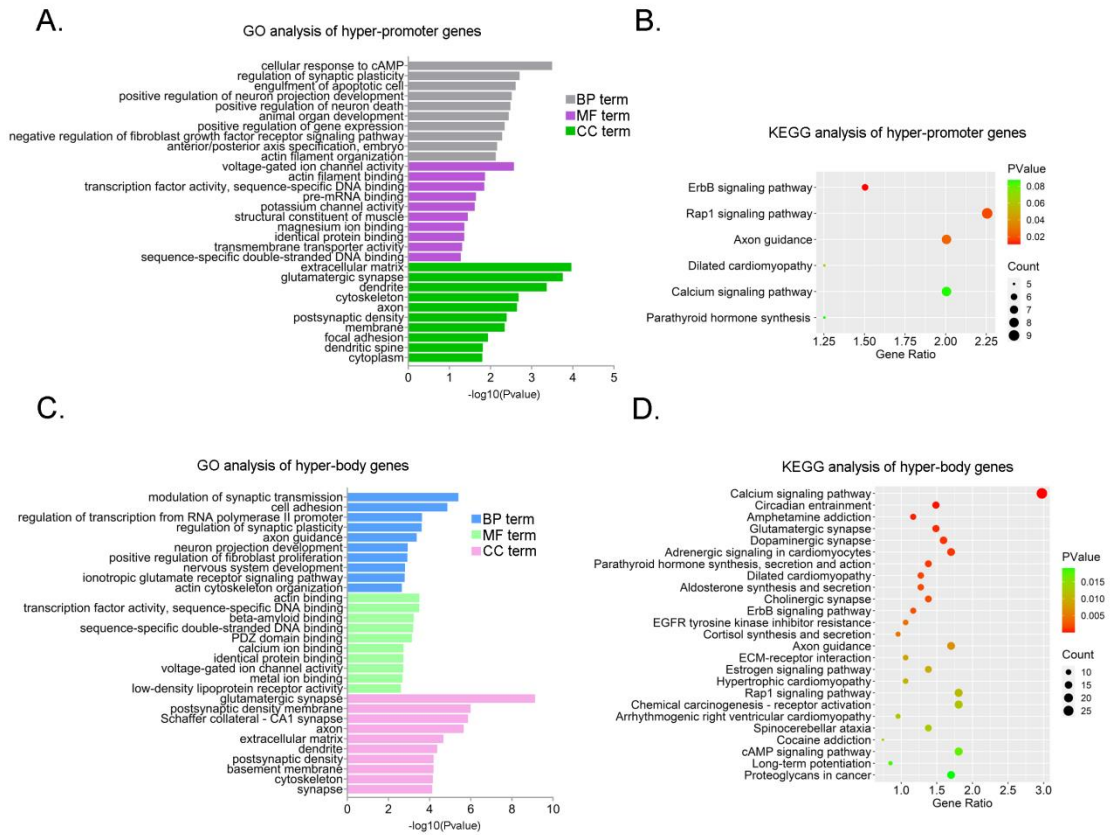

**Supplementary Fig. 2** GO and KEGG enrichment analysis of the hypermethylated promoters and hypermethylated gene bodies. A and B GO (A) and KEGG (B) enrichment analyses of the hypermethylated promoter genes are shown. C and D GO (C) and KEGG (D) enrichment analysis of the hypermethylated body genes.

A.

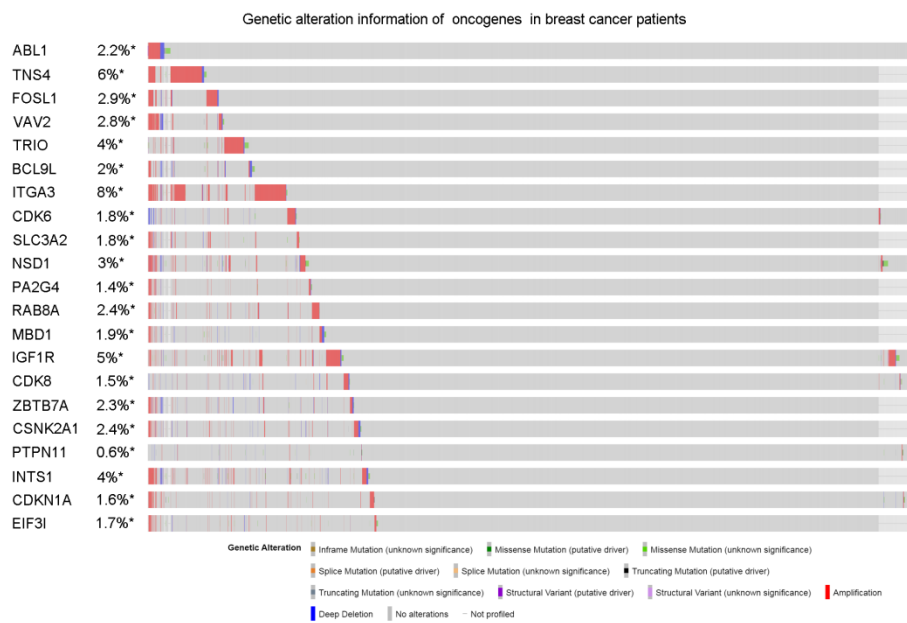

**Supplementary Fig. 3** A visual summary of the oncogene genetic alterations in breast cancer patients using data from the cBio Cancer Genomics Portal.

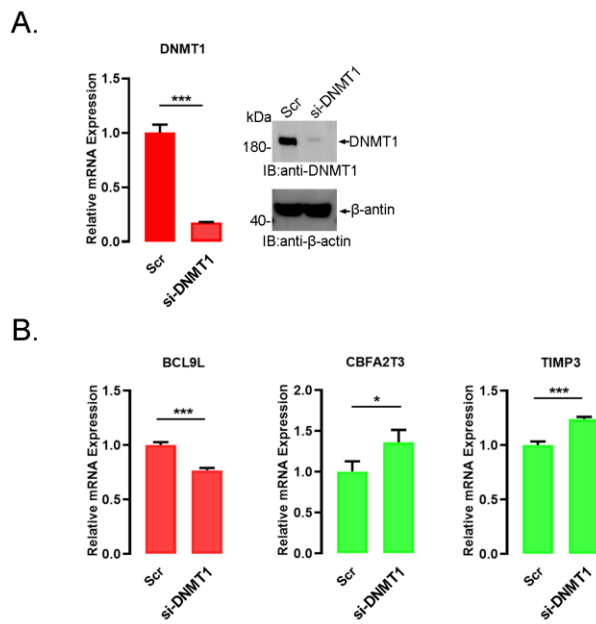

**Supplementary Fig. 4** A MCF-7 cells were transfected with the DNMT1 siRNA or scramble siRNA (as a control) for 72 h and were analyzed by qRT-PCR (left) or immunoblotting (right). B qRT-PCR validation of the oncogene and TSGs. Red represents the oncogenes, and green represents the TSGs. The data are shown as the mean  $\pm$  SD from three independent experiments. \* $p < 0.05$ , \*\*\* $p < 0.01$ .

Supplementary Fig.5

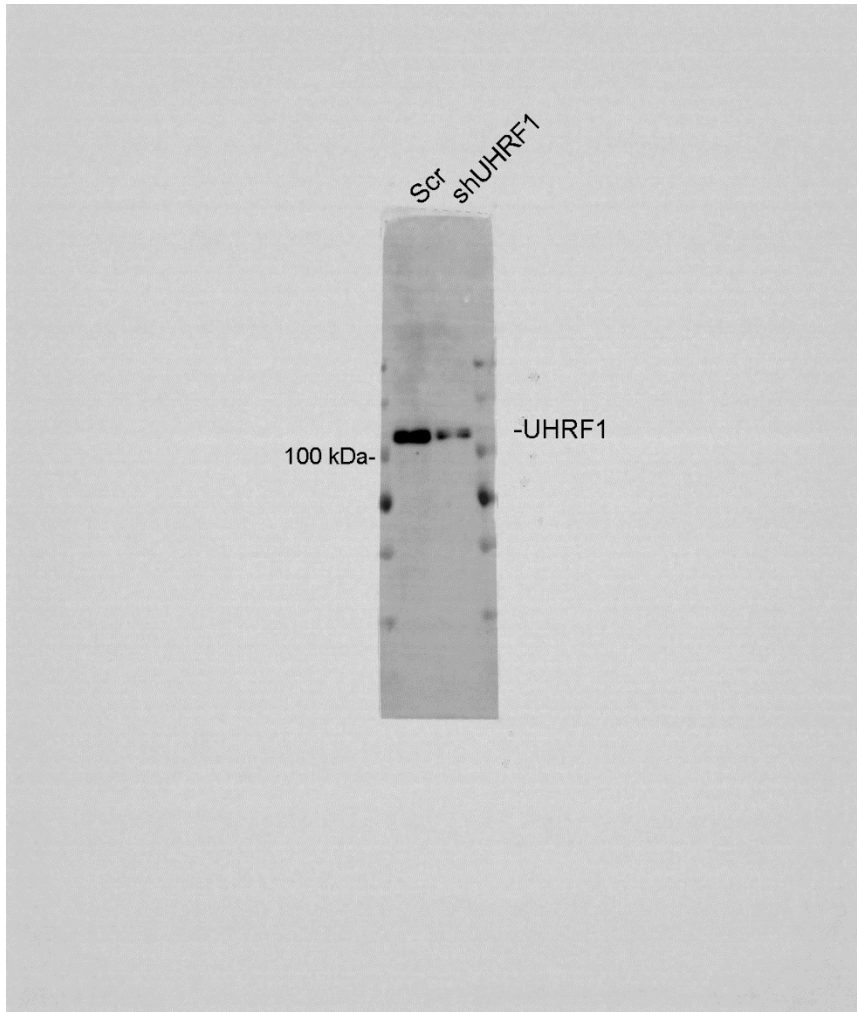

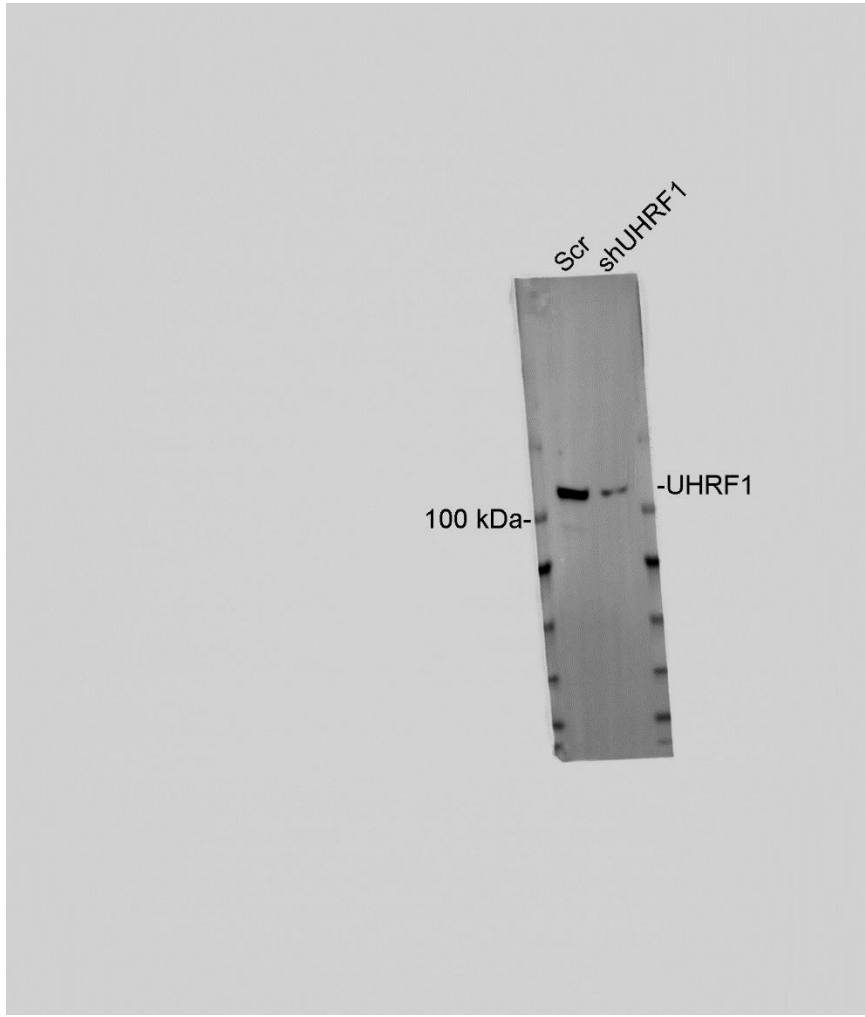

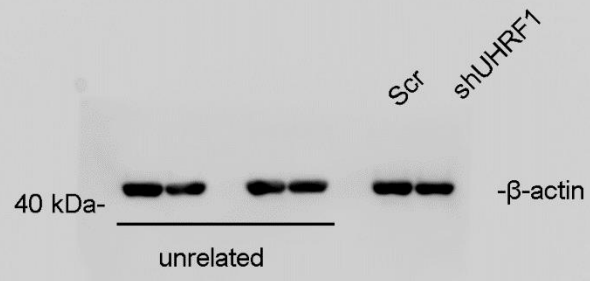

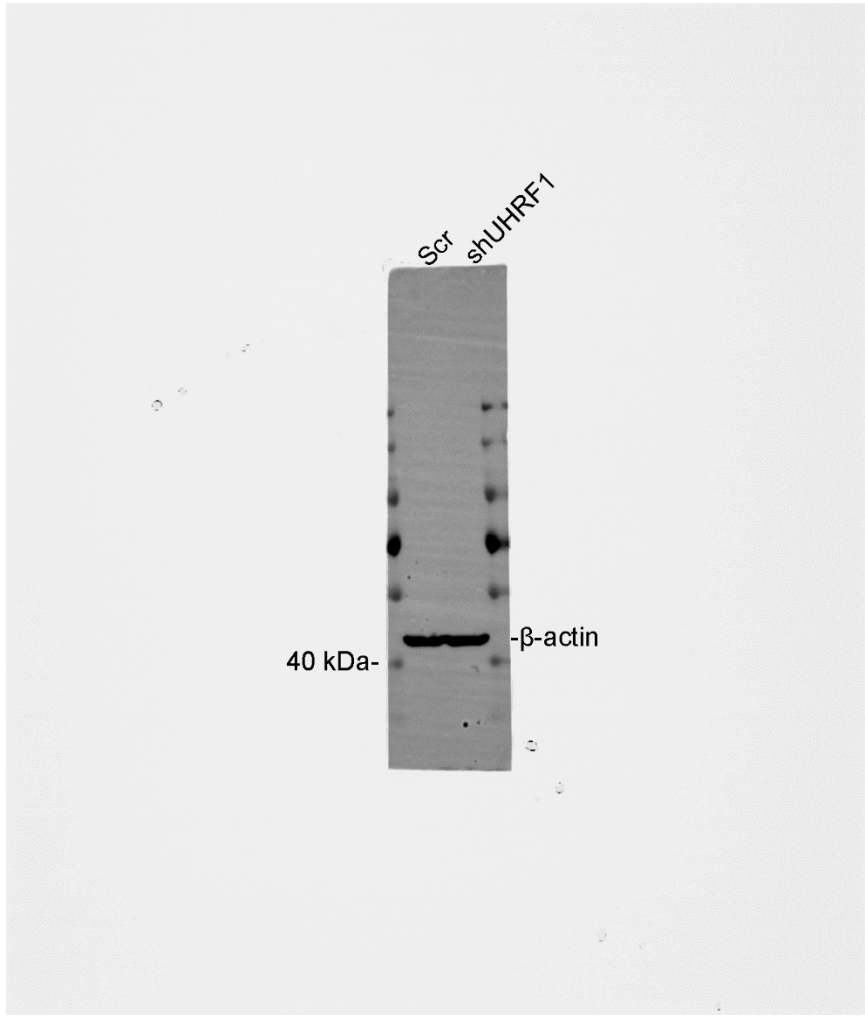



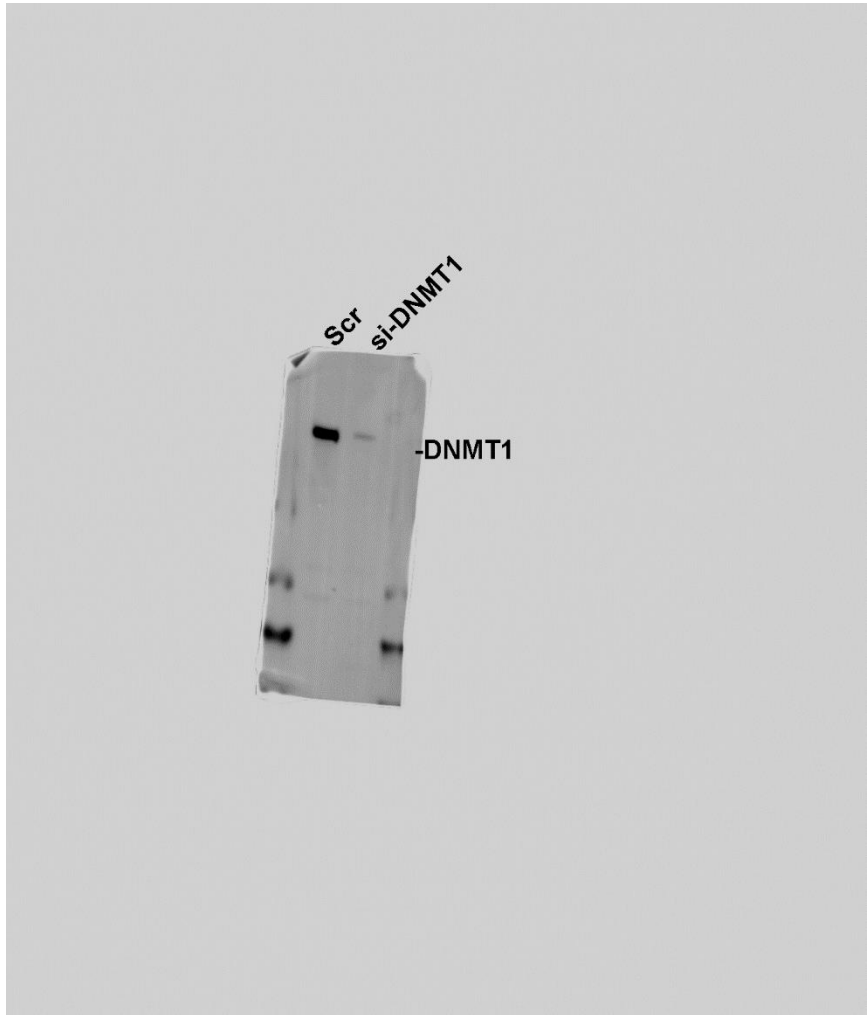

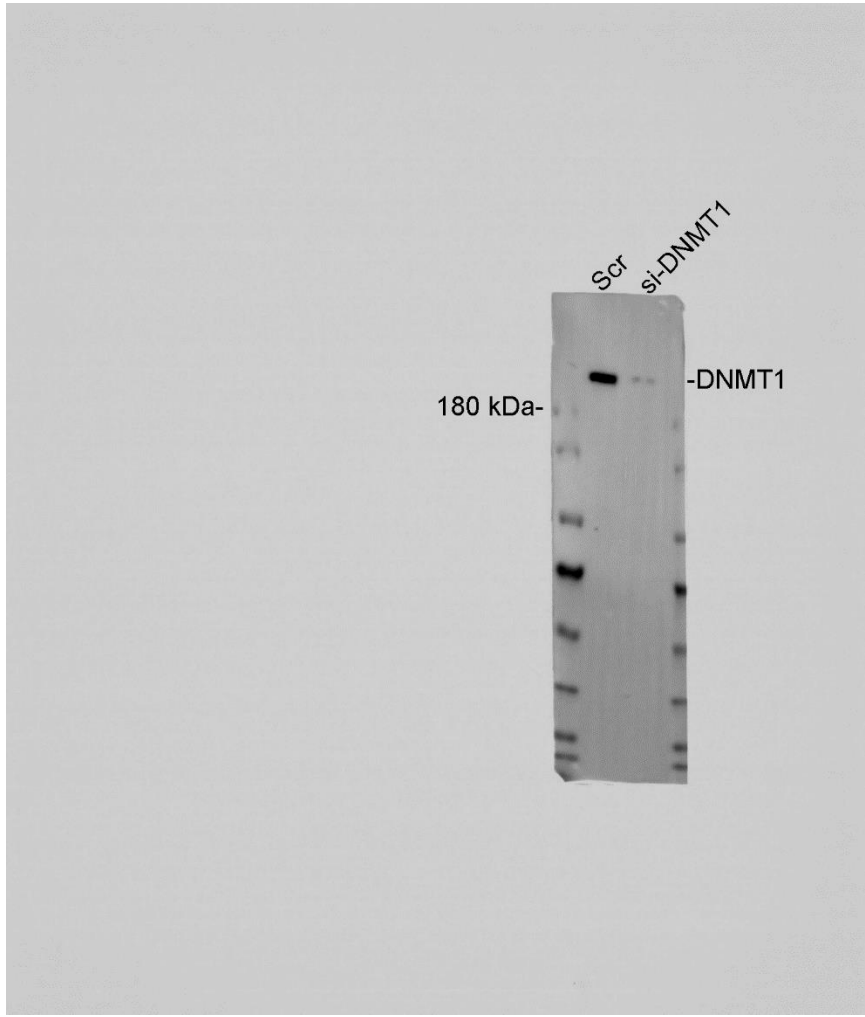

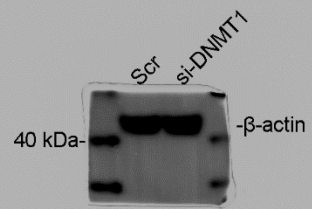

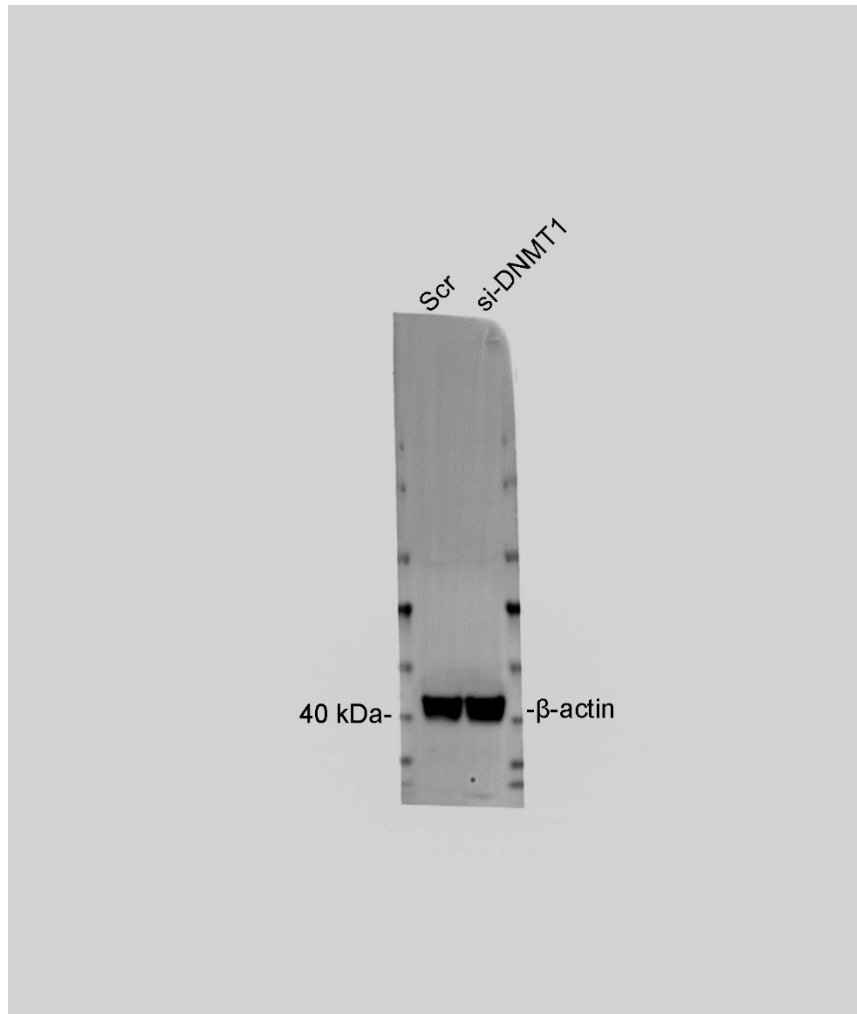

**Supplementary Fig.5** Full length Western blots showing protein levels of UHRF1, DNMT1 and  $\beta$ -actin. The gel was transferred to a membrane, and the membrane were cut prior to hybridisation with antibodies.

### Supplementary Table 1

qRT-PCR primers used in this study:

| primer sequence                        | amplicon size (bp) |
|----------------------------------------|--------------------|
| UHRF1-F: 5'-GTCGGATCATCTTCGTGGAC-3'    | 310                |
| UHRF1-R: 5'-AGTACCACCTCGCTGGCAT-3'     |                    |
| PA2G4-F: 5'-CTGGTCGCTCTTCAAAGGGG-3'    | 474                |
| PA2G4-R: 5'-CGGTACTGAGCCTGTGTGAG-3'    |                    |
| EIF3I-F: 5'-ATGCGGACGTAACCATCTTC-3'    | 163                |
| EIF3I-R: 5'-CCACAACCTCCACCAGGATT-3'    |                    |
| VAV2-F: 5'-CTTTGTTCTGCGCGATGCT-3'      | 75                 |
| VAV2-R: 5'-TCGATGTGCGAGACTTTGGA-3'     |                    |
| ABL1-F: 5'-GCCTAAGACCCGGAGCTTTTCA-3'   | 72                 |
| ABL1-R: 5'-TGTATGATTTTGTGGCCAGTGGAG-3' |                    |
| CDK6-F: 5'-AACTTCCACGAAAAGAGGCTT-3'    | 132                |
| CDK6-R: 5'-CCAGATGGCTCTAACCTCAGT-3'    |                    |
| SLC3A2-F: 5'-GTCTTCCGCCACCTTGATCTT-3'  | 110                |
| SLC3A2-R: 5'-TGAATGAGTTAGAGCCCGAGA-3'  |                    |
| BCL9L-F: 5'-CAGTACAGGCAGCACAGAGAC-3'   | 159                |
| BCL9L-R: 5'-CCACAGGCCAGCCTACTCTT-3'    |                    |
| ZBTB7A-F: 5'-GTTCTTCAGGTCGTAGTTGTG-3'  | 134                |
| ZBTB7A-R: 5'-AGTGCAACATCTGCAAGGTC-3'   |                    |

|                                          |     |
|------------------------------------------|-----|
| CBFA2T3-F: 5'-ACATCTGGAGGAAGGCTGAAGAG-3' | 132 |
| CBFA2T3-R: 5'-GCTCCATCTTGGCACGCT-3'      |     |
| PPP2R1B-F: 5'-CAGCTGGGTGTGGAATTCTT-3'    | 199 |
| PPP2R1B-R: 5'-GTTGTTGGTGGCAGCTTCTC-3'    |     |
| TGFB1-F: 5'-AGGCTCCAAATATAGGGGCAGGGTC-3' | 156 |
| TGFB1-R: 5'-GGATACCAACTATTGCTTCAGCTCC-3' |     |
| TIMP3-F: 5'-TGCTCTCTGTCTCTTTTTTCAGCTT-3' | 142 |
| TIMP3-R: 5'-CTACAGTGTGTTGTCTGCTGCTTTT-3' |     |
| DNMT3A-F: 5'-CAATAATCTCCTTGACCTTGG-3'    | 115 |
| DNMT3A-R: 5'-GAAGAGAAGAATCCCTACAAAG-3'   |     |
| PRKCD-F: 5'-CCCTGTTTCACCAATCCCCA-3'      | 88  |
| PRKCD-R: 5'-TGCCTCACCGATTCAAGGTC-3'      |     |
| LRP1B-F: 5'-CCAAGAGGACGAGAGGCACA-3'      | 72  |
| LRP1B-R: 5'-CCCCAAAGAGCAGCAAGTCT-3'      |     |
| FAM172A-F: 5'-AGAGCCTCGTATCTTTTCTGGT-3'  | 133 |
| FAM172A-R: 5'-TGAACCGCCTCTTGATTTTCC-3'   |     |
| DNMT1-F: 5'-CCATCAGGCATTCTACCA-3'        | 132 |
| DNMT1-R: 5'-CGTTCTCCTTGTCTTCTCT-3'       |     |
| GAPDH-F: 5'-GGCTGTTGTCATACTTCTCATGG-3'   | 197 |
| GAPDH-R: 5'-GGAGCGAGATCCCTCCAAAAT-3'     |     |

---

siRNA sequence:

si-DNMT1 sense: 5'-CAAUGAGACUGACAUCAAA-3'

si-DNMT1 antisense: 5'-GUUACUCUGACUGUAGUUU-3'
